Development 139, 828 (2012) doi:10.1242/dev.079152  
© 2012. Published by The Company of Biologists Ltd

## Palatogenesis: morphogenetic and molecular mechanisms of secondary palate development

**Jeffrey O. Bush and Rulang Jiang**

There were errors published in *Development* **139**, 231-243.

On page 238, the citation to Jin and Ding (2006a) should be to Jin and Ding (2006b). The incorrect reference was listed for Pauws et al. (2009). The correct reference is given below.

The authors apologise to readers for these mistakes.

**Pauws, E., Hoshino, A., Bentley, L., Prajapati, S., Keller, C., Hammond, P., Martinez-Barbera, J. P., Moore, G. E. and Stanier, P. (2009).** *Tbx22*<sup>null</sup> mice have a submucous cleft palate due to reduced palatal bone formation and also display ankyloglossia and choanal atresia phenotypes. *Hum. Mol. Genet.* **18**, 4171-4179.
